# Supplementary material
Source: PubMed Central journal article supplement (PMC3587452)

## **Supplemental Material to:**

**Ilana Chefetz, Ayesha B. Alvero, Jennie C. Holmberg,  
Noah Lebowitz, Vinicius Craveiro, Yang Yang-Hartwich,  
Gang Yin, Lisa Squillace, Marta Gurrea Soteras,  
Paulomi Aldo and Gil Mor**

**TLR2 enhances ovarian cancer stem cell self-renewal and  
promotes tumor repair and recurrence**

**2013; 12(3)**

**<http://dx.doi.org/10.4161/cc.23406>**

**<http://www.landesbioscience.com/journals/cc/article/23406>**

## Legends to Supplementary Figures

**S. Figure 1: Expression of CD44 in recurrent EOC patients.** A high number of CD44 positive cells were detected by immunohistochemistry (brown staining) in EOC tumors from patients with recurrent disease. Representative sections from two patients are shown in A & B.

**S. Figure 2: Wound repair in CD44+ /MyD88+ EOC stem cells.** EOC stem cells were grown to complete confluence. Following wounding using the wound maker tool, repair was determined by wound width was quantified by Incucyte imaging system.

**S. Figure 3: *In vitro* wound/repair model.** CD44+.MyD88+ EOC stem cells were grown to full confluence prior to wounding. Cell pellet from different areas (WE, WB) and control were obtained.

**S. Figure 4: TLR2 ligation by PGN activates NFκB.** NFκB activity was measured in CD44+.MyD88+ EOC stem cells using a luciferase reporter construct, pBII-LUC containing two κB sites before a FOS essential promoter.

**S. Figure 5 NFκB inhibition decreases IL-6 secretion.** Effect of NFκB inhibitor BAY 11-7082 on IL-6 secretion level was evaluated after 24 hr by xMAP technology

### Supplementary Movies:

**Movie 1.** In vitro wound/repair in CD44+/MyD88+ EOC stem cell cultures

**Movie 2.** CD44-/MyD88- EOC cells do not repair *in vitro* wound

## Supplementary Fig. 1

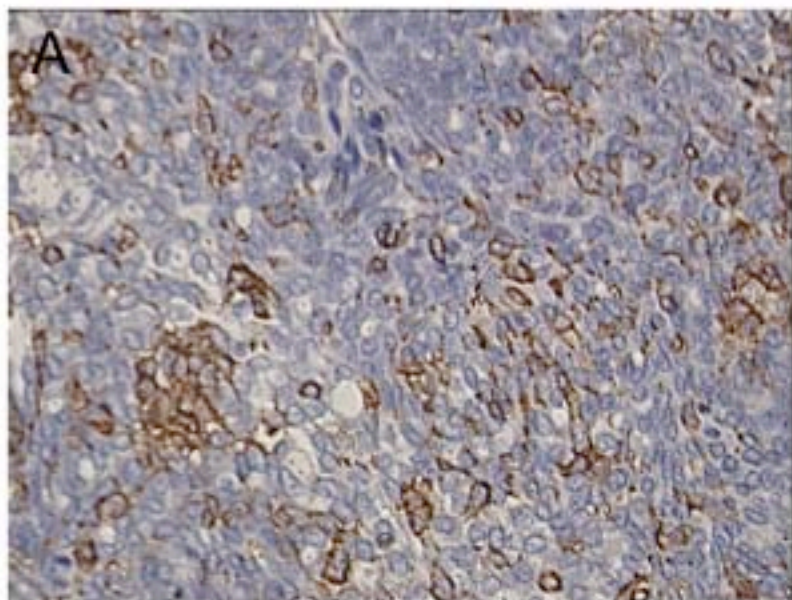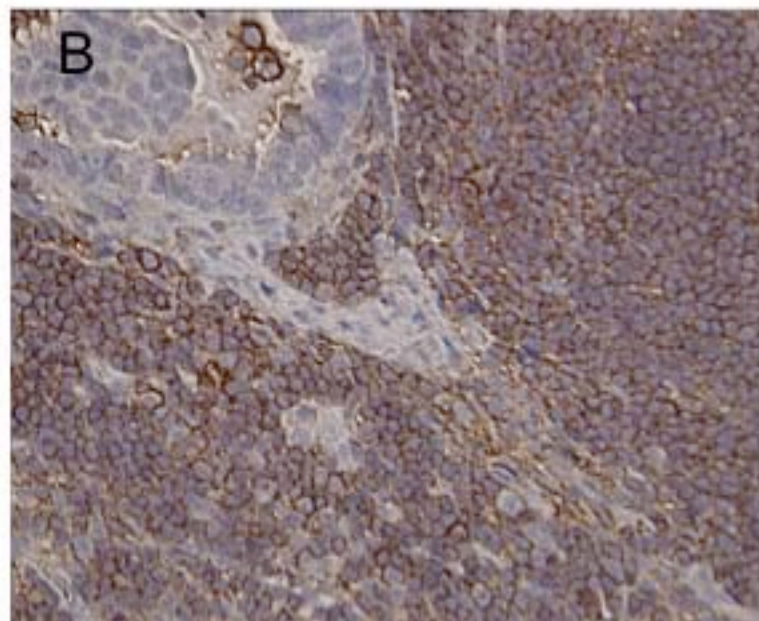

# Supplementary Fig. 2

0

4

12

24

36

48

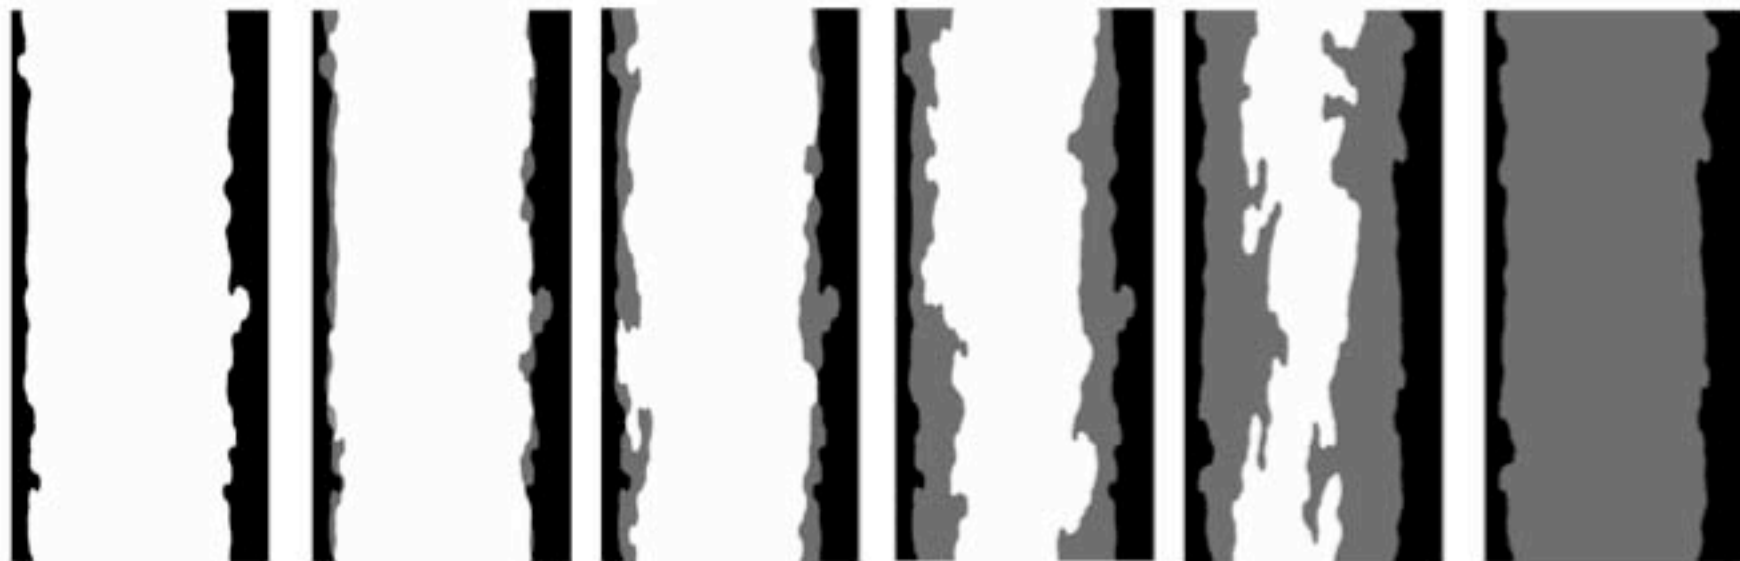

### Supplementary Fig. 3

Control  
(no wound)

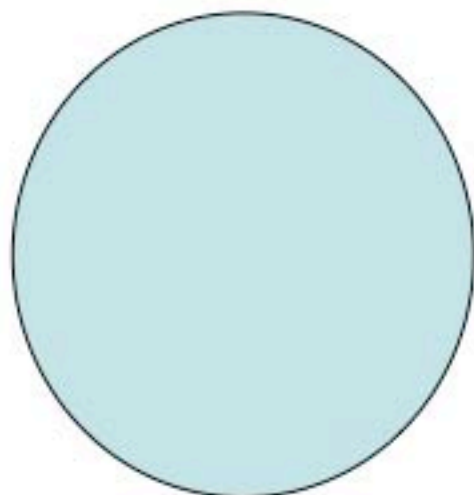

WE

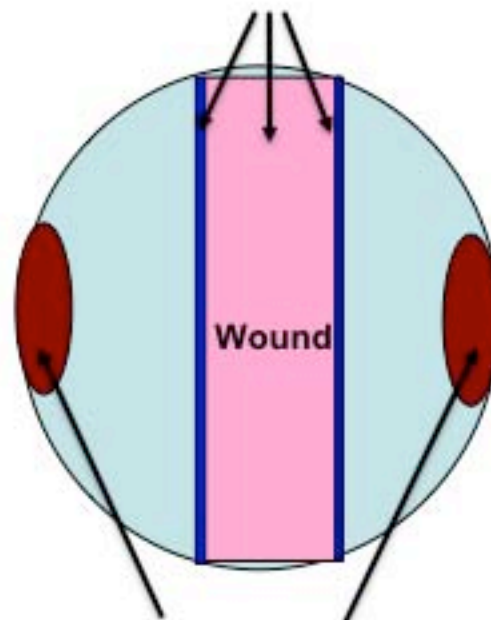

WB

Supplementary Fig. 4

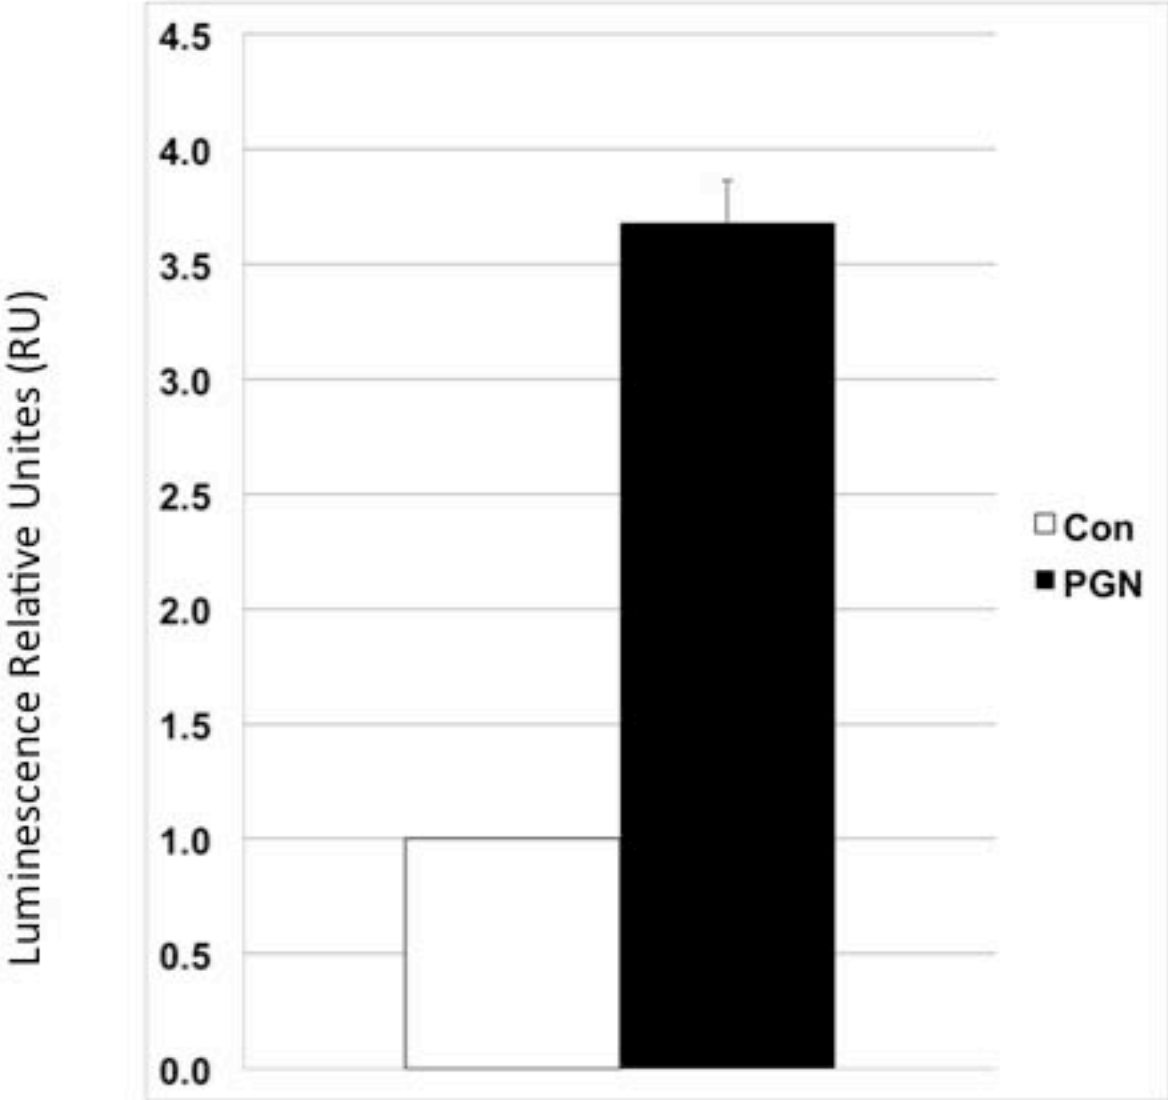

**Supplementary Fig. 5**

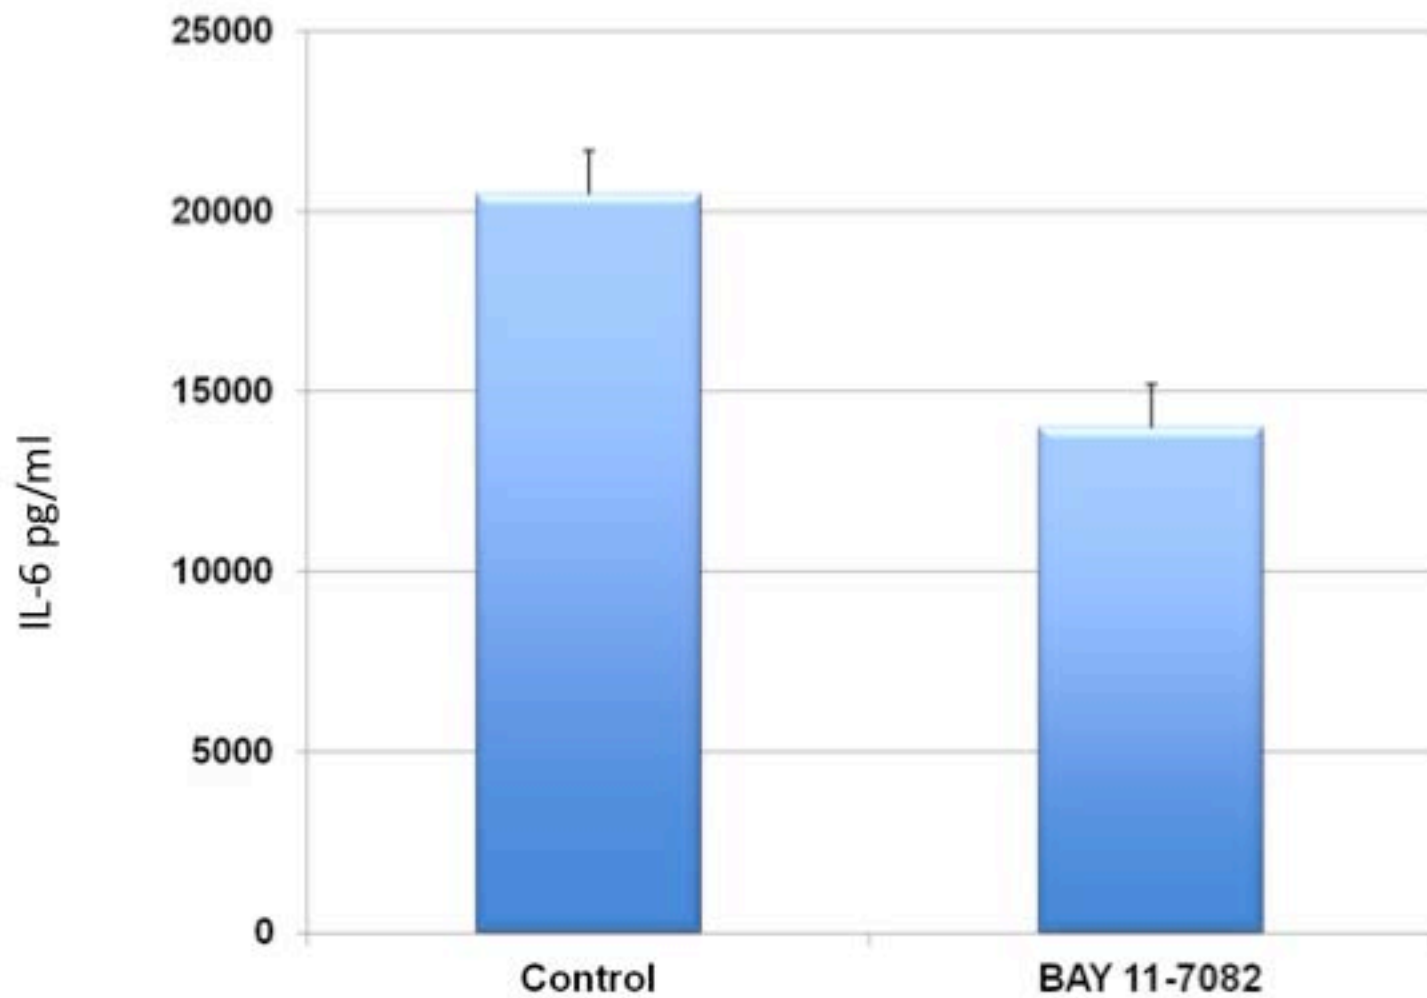

Supplement: cc-12-511-s02.pdf [file cc-12-511-s02.pdf]
